# Supplementary material for: Effects of tobacco smoke and electronic cigarette vapor exposure on the oral and gut microbiota in humans: a pilot study
Source: PeerJ journal article supplement (doi:10.7717/peerj.4693), 2018-04-30
Supplement: Sup_Fig_3_-_CO_correlations.pdf [file Sup_Fig_3_-_CO_correlations.pdf]

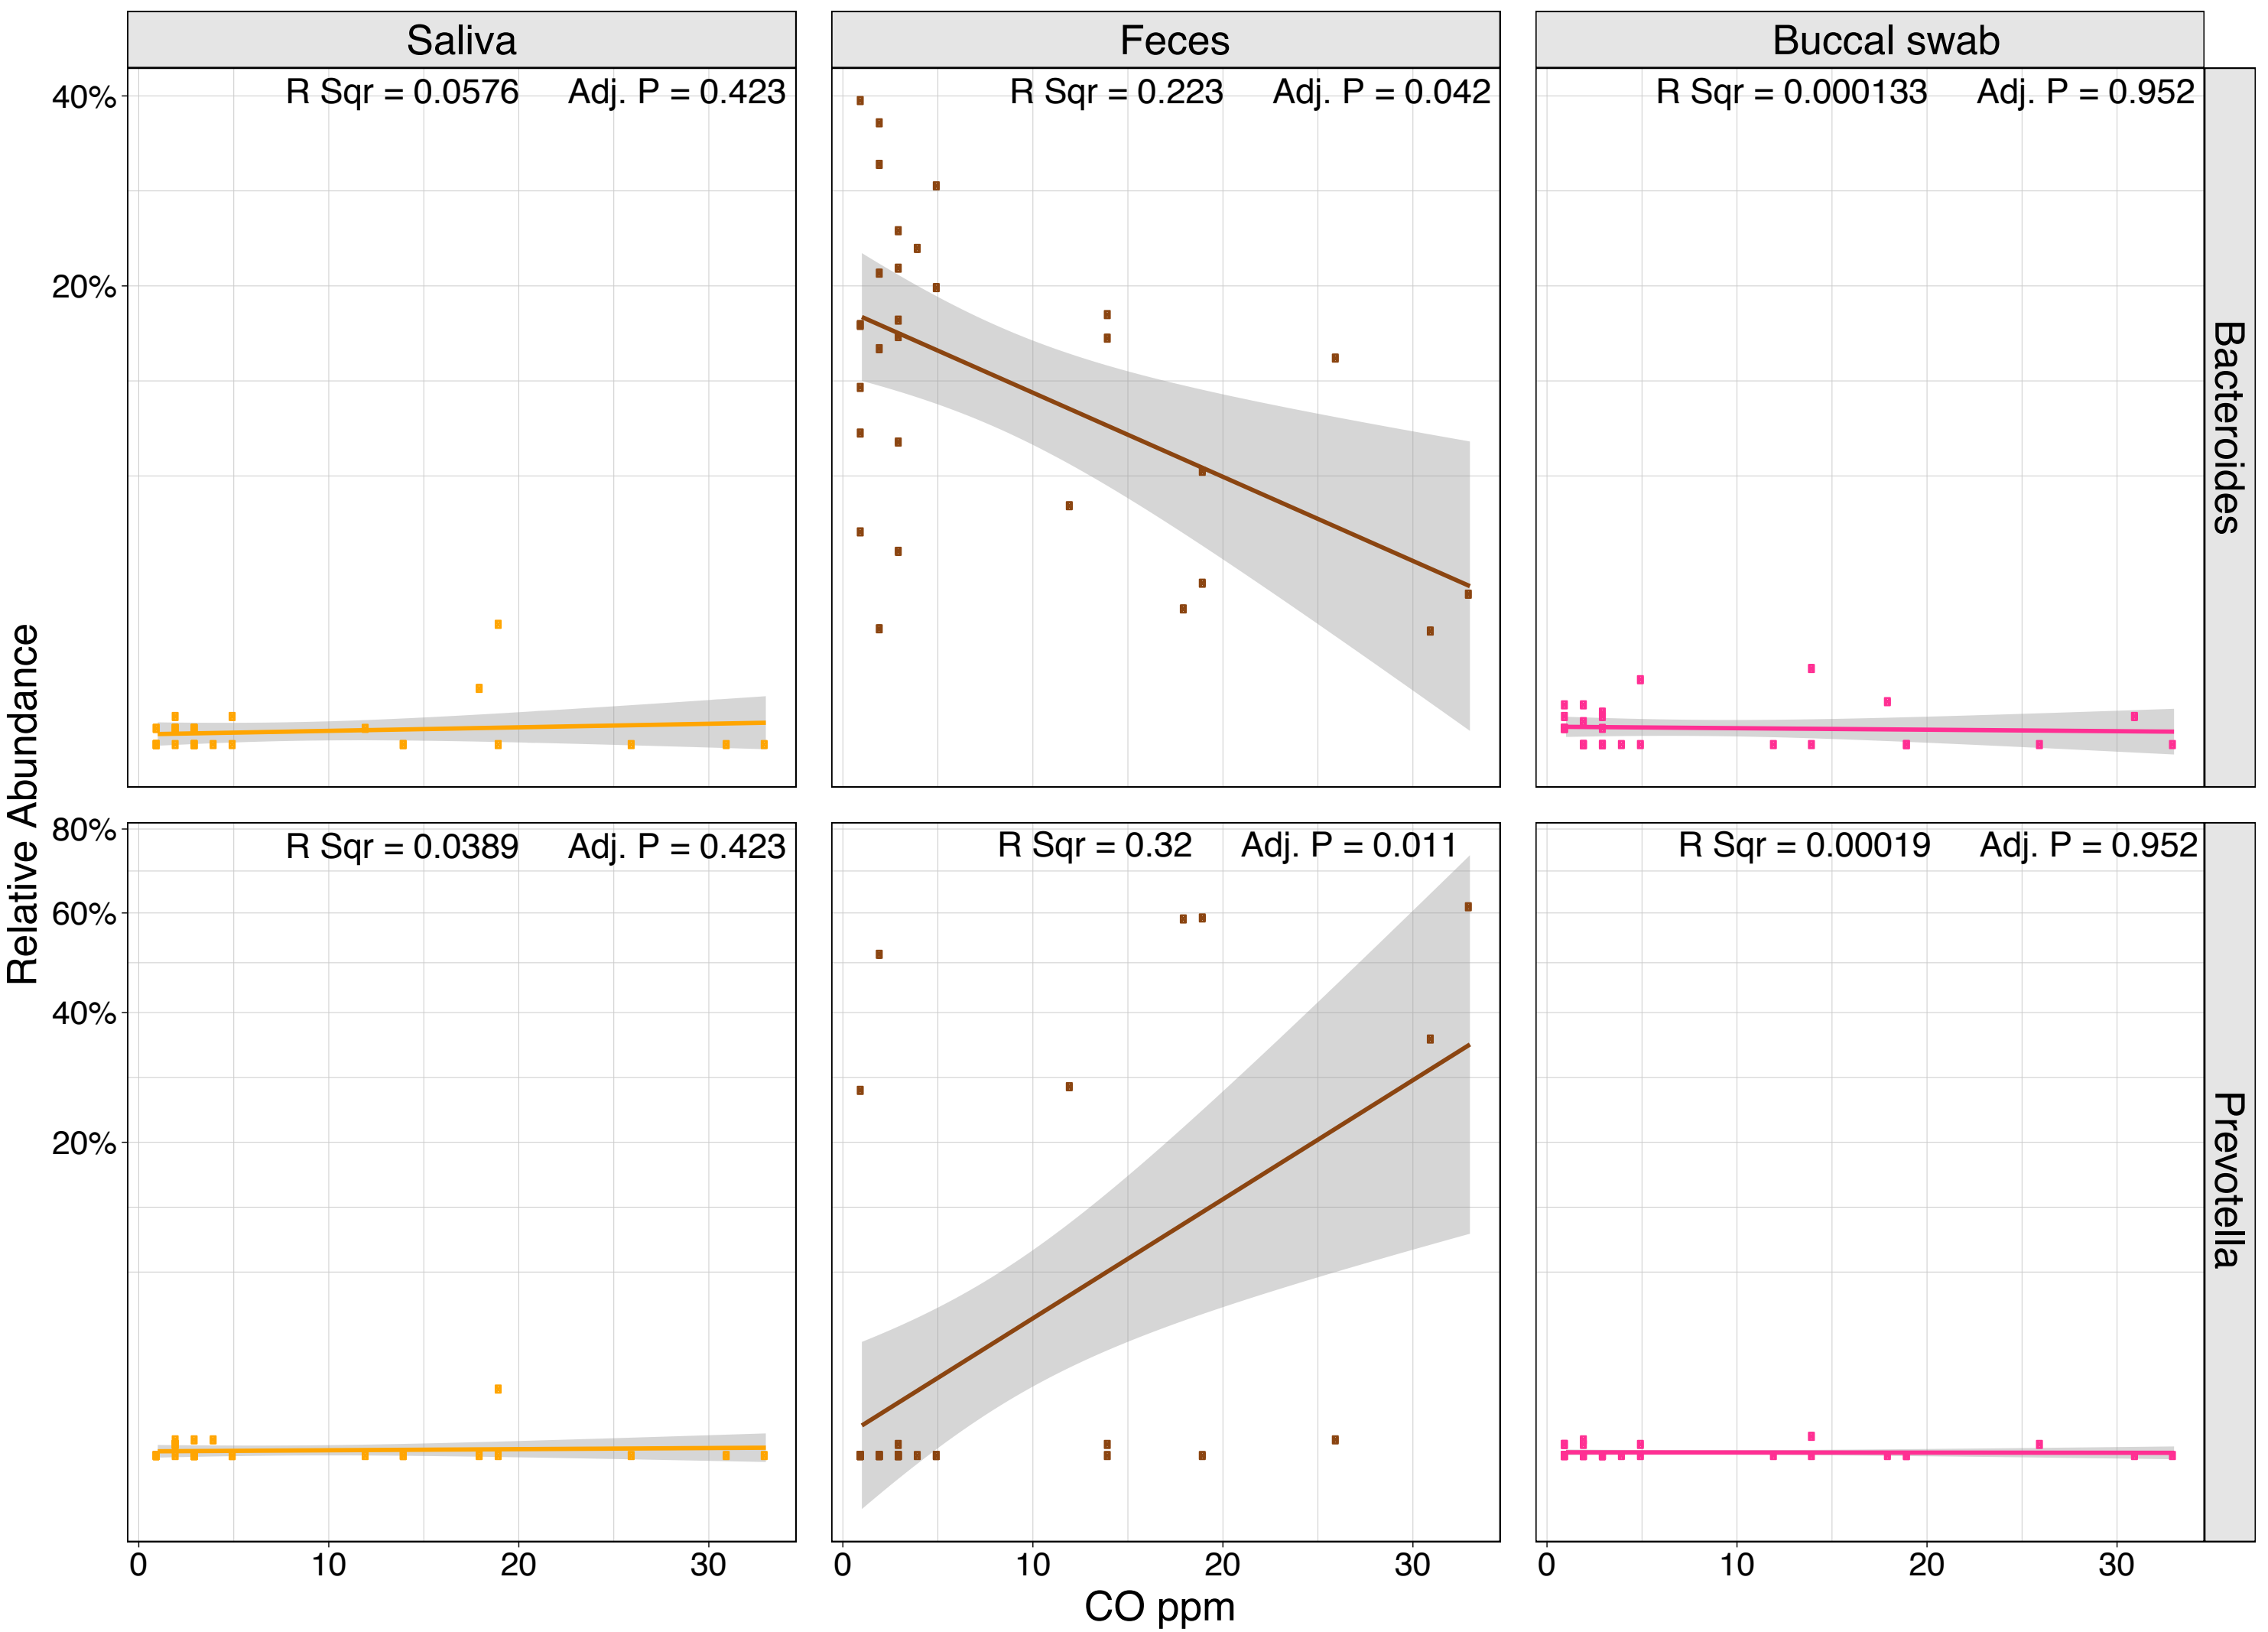

Saliva

Feces

Buccal swab

R Sqr = 0.0576 Adj. P = 0.423

R Sqr = 0.223 Adj. P = 0.042

R Sqr = 0.000133 Adj. P = 0.952

Bacteroides

R Sqr = 0.0389 Adj. P = 0.423

R Sqr = 0.32 Adj. P = 0.011

R Sqr = 0.00019 Adj. P = 0.952

Prevotella

CO ppm
